# Supplementary material for: Pathogen Profiles in Outpatients with Non-COVID-19 during the 7th Prevalent Period of COVID-19 in Gunma, Japan
Source: MDPI journal article supplement (doi:10.3390/microorganisms11092142), 2023-08-24
Supplement: s1 [file s1]

Table S1: Non-pathogenic Coryneform detected in the present cases.

| Case No. | Age | Gender | Onset date | Sampling date | Symptoms                                        | Estimated pathogens                                                                                                                                                                                                                                                                                                                                                                                                                                                                                       |
|----------|-----|--------|------------|---------------|-------------------------------------------------|-----------------------------------------------------------------------------------------------------------------------------------------------------------------------------------------------------------------------------------------------------------------------------------------------------------------------------------------------------------------------------------------------------------------------------------------------------------------------------------------------------------|
| 2        | 20  | F      | 2022/9/19  | 2022/9/20     | fever, malaise, headache                        | <i>Corynebacterium segmentosum</i> (73)<br><i>Corynebacterium kefirresidentii</i> (42)<br><i>Corynebacterium tuberculo-tearicum</i> (12)<br><i>Corynebacterium sanguinis</i> (4)<br><i>Corynebacterium endometrii</i> (2)                                                                                                                                                                                                                                                                                 |
| 3        | 75  | F      | 2022/9/17  | 2022/9/20     | fever, malaise, cough, swollen throat           | <i>Corynebacterium propinquum</i> (1176)<br><i>Corynebacterium spp.</i> (200)<br><i>Corynebacterium accolens</i> (120)<br><i>Corynebacterium pseudotuberculosis</i> (69)<br><i>Corynebacterium striatum</i> (52)                                                                                                                                                                                                                                                                                          |
| 5        | 25  | F      | 2022/9/19  | 2022/9/21     | sore throat, headache                           | <i>Corynebacterium segmentosum</i> (72)<br><i>Corynebacterium accolens</i> (6)<br><i>Corynebacterium kefirresidentii</i> (4)<br><i>Corynebacterium kroppenstedtii</i> (2)<br><i>Corynebacterium tuberculo-tearicum</i> (2)<br><i>Corynebacterium sanguinis</i> (2)<br><i>Corynebacterium rouxii</i> (2)<br><i>Corynebacterium ciconiae</i> (1)                                                                                                                                                            |
| 6        | 31  | M      | 2022/9/22  | 2022/9/24     | fever, malaise, sore throat, headache           | <i>Corynebacterium segmentosum</i> (150)<br><i>Corynebacterium spp.</i> (31)<br><i>Corynebacterium kefirresidentii</i> (12)<br><i>Corynebacterium sanguinis</i> (6)<br><i>Corynebacterium tuberculo-tearicum</i> (5)<br><i>Corynebacterium simulans</i> (5)<br><i>Corynebacterium ciconiae</i> (2)<br><i>Corynebacterium canis</i> (2)<br><i>Corynebacterium lactis RW2-5</i> (2)<br><i>Corynebacterium glutamicum</i> (1)<br><i>Corynebacterium occultum</i> (1)<br><i>Corynebacterium stationis</i> (1) |
| 7        | 56  | F      | 2022/9/22  | 2022/9/24     | fever, malaise, lymphadenonopathy under the ear | <i>Corynebacterium segmentosum</i> (4)<br><i>Corynebacterium tuberculo-tearicum</i> (2)<br><i>Corynebacterium kefirresidentii</i> (2)                                                                                                                                                                                                                                                                                                                                                                     |
| 11       | 47  | F      | 2022/9/26  | 2022/9/27     | fever, malaise, headache, stuffy nose           | <i>Corynebacterium segmentosum</i> (5)<br><i>Corynebacterium kefirresidentii</i> (4)<br><i>Corynebacterium rouxii</i> (2)                                                                                                                                                                                                                                                                                                                                                                                 |

|    |    |   |           |           |                        |                                                                                                                                                                                                                                                                                                                                                                                                                                                                                                         |
|----|----|---|-----------|-----------|------------------------|---------------------------------------------------------------------------------------------------------------------------------------------------------------------------------------------------------------------------------------------------------------------------------------------------------------------------------------------------------------------------------------------------------------------------------------------------------------------------------------------------------|
| 12 | 52 | M | 2022/9/28 | 2022/9/28 | fever, cough, diarrhea | <i>Corynebacterium segmentosum</i> (7)<br><i>Corynebacterium tuberculostrictum</i> (5)<br><i>Corynebacterium kefirresidentii</i> (2)                                                                                                                                                                                                                                                                                                                                                                    |
| 13 | 46 | F | 2022/9/26 | 2022/9/28 | fever, diarrhea        | <i>Corynebacterium kefirresidentii</i> (4)<br><i>Corynebacterium tuberculostrictum</i> (2)<br><i>Corynebacterium simulans</i> (2)<br><i>Corynebacterium segmentosum</i> (1)                                                                                                                                                                                                                                                                                                                             |
| 14 | 27 | F | 2022/9/24 | 2022/9/28 | fever                  | <i>Corynebacterium macginleyi</i> (11)<br><i>Corynebacterium sanguinis</i> (10)<br><i>Corynebacterium occultum</i> (9)<br><i>Corynebacterium kefirresidentii</i> (4)<br><i>Corynebacterium tuberculostrictum</i> (2)<br><i>Corynebacterium endometritii</i> (2)                                                                                                                                                                                                                                         |
| 16 | 33 | F | 2022/9/30 | 2022/9/30 | fever, malaise         | <i>Corynebacterium kefirresidentii</i> (10)<br><i>Corynebacterium segmentosum</i> (9)<br><i>Corynebacterium simulans</i> (6)<br><i>Corynebacterium tuberculostrictum</i> (3)                                                                                                                                                                                                                                                                                                                            |
| 17 | 46 | M | 2022/9/29 | 2022/9/30 | sore throat            | <i>Corynebacterium spp.</i> (27)<br><i>Corynebacterium kefirresidentii</i> (14)<br><i>Corynebacterium segmentosum</i> (12)<br><i>Corynebacterium simulans</i> (8)<br><i>Corynebacterium tuberculostrictum</i> (7)<br><i>Corynebacterium lipophiloflavum</i> (2)<br><i>Corynebacterium occultum</i> (1)<br><i>Corynebacterium sanguinis</i> (1)<br><i>Corynebacterium glaucum</i> (1)                                                                                                                    |
| 18 | 15 | M | 2022/10/2 | 2022/10/3 | fever, sore throat     | <i>Corynebacterium segmentosum</i> (113)<br><i>Corynebacterium kefirresidentii</i> (46)<br><i>Corynebacterium tuberculostrictum</i> (30)<br><i>Corynebacterium simulans</i> (11)<br><i>Corynebacterium occultum</i> (11)<br><i>Corynebacterium sanguinis</i> (7)<br><i>Corynebacterium spp.</i> (4)<br><i>Corynebacterium phocae</i> (4)<br><i>Corynebacterium ciconiae</i> (3)<br><i>Corynebacterium comes</i> (2)<br><i>Corynebacterium kroppenstedtii</i> (1)<br><i>Corynebacterium falsenii</i> (1) |

|    |    |   |            |            |                                       |                                                                                                                                                                                                                                                                                                                                                                                                                                                                                                                                                                                                   |
|----|----|---|------------|------------|---------------------------------------|---------------------------------------------------------------------------------------------------------------------------------------------------------------------------------------------------------------------------------------------------------------------------------------------------------------------------------------------------------------------------------------------------------------------------------------------------------------------------------------------------------------------------------------------------------------------------------------------------|
| 20 | 53 | F | 2022/10/3  | 2022/10/3  | fever                                 | <i>Corynebacterium segmentosum</i> (128)<br><i>Corynebacterium sanguinis</i> (7)<br><i>Corynebacterium spp.</i> (6)<br><i>Corynebacterium tuberculostrictum</i> (6)<br><i>Corynebacterium endometritii</i> (6)<br><i>Corynebacterium singular</i> (2)<br><i>Corynebacterium occultum</i> (2)<br><i>Corynebacterium simulans</i> (1)<br><i>Corynebacterium phocae</i> (1)<br><i>Corynebacterium macginleyi</i> (1)<br><i>Corynebacterium flavescens</i> (1)                                                                                                                                        |
| 23 | 63 | M | 2022/10/10 | 2022/10/11 | sore throat                           | <i>Corynebacterium segmentosum</i> (140)                                                                                                                                                                                                                                                                                                                                                                                                                                                                                                                                                          |
| 24 | 31 | M | 2022/10/10 | 2022/10/11 | fever, malaise, sore throat, headache | <i>Corynebacterium spp.</i> (16)<br><i>Corynebacterium tuberculostrictum</i> (12)<br><i>Corynebacterium kefirresidentii</i> (8)<br><i>Corynebacterium sanguinis</i> (5)<br><i>Corynebacterium phocae</i> (3)<br><i>Corynebacterium occultum</i> (3)<br><i>Corynebacterium ciconiae</i> (2)<br><i>Corynebacterium uterequi</i> (2)<br><i>Corynebacterium macginleyi</i> (2)<br><i>Corynebacterium endometritii</i> (2)<br><i>Corynebacterium simulans</i> (1)<br><i>Corynebacterium urogenitale</i> (1)                                                                                            |
| 25 | 54 | M | 2022/10/7  | 2022/10/11 | fever, malaise, sore throat           | <i>Corynebacterium kefirresidentii</i> (79)                                                                                                                                                                                                                                                                                                                                                                                                                                                                                                                                                       |
| 26 | 34 | F | 2022/10/12 | 2022/10/12 | fever, cough, sore throat             | <i>Corynebacterium tuberculostrictum</i> (62)<br><i>Corynebacterium simulans</i> (19)<br><i>Corynebacterium segmentosum</i> (15)<br><i>Corynebacterium singular</i> (7)<br><i>Corynebacterium occultum</i> (6)<br><i>Corynebacterium kroppenstedtii</i> (2)<br><i>Corynebacterium sanguinis</i> (2)<br><i>Corynebacterium sp. FDAARGOS 1242</i> (2)<br><i>Corynebacterium endometritii</i> (2)<br><i>Corynebacterium phocae</i> (1)<br><i>Corynebacterium coyleae</i> (1)<br><i>Corynebacterium nuruki</i> (1)<br><i>Corynebacterium flavescens</i> (1)<br><i>Corynebacterium sp. 4H37-19</i> (1) |

|    |    |   |            |            |                                             |                                                                                                                                                                                                                                                                                                                                                                                                                                                                                                                       |
|----|----|---|------------|------------|---------------------------------------------|-----------------------------------------------------------------------------------------------------------------------------------------------------------------------------------------------------------------------------------------------------------------------------------------------------------------------------------------------------------------------------------------------------------------------------------------------------------------------------------------------------------------------|
| 27 | 20 | M | 2022/10/13 | 2022/10/14 | fever, malaise, sore throat, swollen throat | <i>Corynebacterium segmentosum</i> (27)<br><i>Corynebacterium kefirresidentii</i> (12)<br><i>Corynebacterium tuberculostrictaricum</i> (3)<br><i>Corynebacterium ciconiae</i> (2)<br><i>Corynebacterium imitans</i> (2)<br><i>Corynebacterium spp.</i> (2)<br><i>Corynebacterium simulans</i> (1)                                                                                                                                                                                                                     |
| 28 | 16 | M | 2022/10/13 | 2022/10/14 | fever, sore throat                          | <i>Corynebacterium kefirresidentii</i> (14)<br><i>Corynebacterium kroppenstedtii</i> (10)<br><i>Corynebacterium tuberculostrictaricum</i> (3)<br><i>Corynebacterium occultum</i> (2)<br><i>Corynebacterium sanguinis</i> (2)<br><i>Corynebacterium segmentosum</i> (2)<br><i>Corynebacterium simulans</i> (2)                                                                                                                                                                                                         |
| 29 | 39 | M | 2022/10/17 | 2022/10/17 | malaise, sore throat                        | <i>Corynebacterium segmentosum</i> (8)<br><i>Corynebacterium spp.</i> (3)<br><i>Corynebacterium phocae</i> (1)                                                                                                                                                                                                                                                                                                                                                                                                        |
| 33 | 34 | M | 2022/10/18 | 2022/10/21 | fever, malaise, sore throat                 | <i>Corynebacterium kefirresidentii</i> (12)<br><i>Corynebacterium simulans</i> (10)<br><i>Corynebacterium sanguinis</i> (4)<br><i>Corynebacterium tuberculostrictaricum</i> (3)<br><i>Corynebacterium kroppenstedtii</i> (2)<br><i>Corynebacterium variabile</i> (1)<br><i>Corynebacterium singular</i> (1)                                                                                                                                                                                                           |
| 36 | 42 | M | 2022/10/21 | 2022/10/24 | fever                                       | <i>Corynebacterium segmentosum</i> (10)<br><i>Corynebacterium spp.</i> (8)<br><i>Corynebacterium ciconiae</i> (3)<br><i>Corynebacterium kalinowskii</i> (1)                                                                                                                                                                                                                                                                                                                                                           |
| 37 | 61 | F | 2022/10/24 | 2022/10/24 | sore throat                                 | <i>Corynebacterium segmentosum</i> (6)<br><i>Corynebacterium kefirresidentii</i> (4)                                                                                                                                                                                                                                                                                                                                                                                                                                  |
| 38 | 31 | M | 2022/10/24 | 2022/10/25 | fever, malaise, stomach ache, nausea        | <i>Corynebacterium segmentosum</i> (99)<br><i>Corynebacterium kefirresidentii</i> (23)<br><i>Corynebacterium tuberculostrictaricum</i> (21)<br><i>Corynebacterium sanguinis</i> (11)<br><i>Corynebacterium occultum</i> (9)<br><i>Corynebacterium lipophiloflavum</i> (4)<br><i>Corynebacterium singular</i> (3)<br><i>Corynebacterium phocae</i> (3)<br><i>Corynebacterium simulans</i> (2)<br><i>Corynebacterium glutamicum</i> (2)<br><i>Corynebacterium ciconiae</i> (1)<br><i>Corynebacterium macginleyi</i> (1) |

*Corynebacterium urogenitale* (1)  
*Corynebacterium endometritii* (1)

40      66      F      2022/10/27      2022/10/28      fever, diarrhea

*Corynebacterium* sp. (31)  
*Corynebacterium segmentosum* (8)  
*Corynebacterium occultum* (5)  
*Corynebacterium kefirresidentii* (4)  
*Corynebacterium tuberculostearicum* (3)  
*Corynebacterium sanguinis* (3)  
*Corynebacterium simulans* (2)  
*Corynebacterium phocae* (2)

---
